# Supplementary material for: Nanosized MnO2 spines on Au stems for high-performance flexible supercapacitor electrodes
Source: Royal Society of Chemistry journal article supplement (doi:10.1039/c3ta12911j), 2013-01-01
Supplement: c3ta12911j.pdf [file c3ta12911j.pdf]

## Electronic Supplementary Information

### Nanosized MnO<sub>2</sub> Spines on Au Stems for High-Performance Flexible Supercapacitor Electrodes

Yu-Liang Chen,<sup>a</sup> Po-Chin Chen,<sup>a</sup> Tze-Lung Chen,<sup>a</sup> Chi-Young Lee<sup>b</sup> and Hsin-Tien Chiu<sup>\*a</sup>

<sup>a</sup>Department of Applied Chemistry, National Chiao Tung University, Hsinchu, Taiwan 30010, R. O. C.

<sup>b</sup>Department of Materials Science and Engineering, National Tsing Hua University, Hsinchu, Taiwan 30013, R. O. C.

**Table S1.** Charges applied and MnO<sub>2</sub> masses loaded on Au NWs at different plating time.

**Figure S1.** Low and high magnification (insets) SEM images of the nanostructures on flexible PET substrates: (a) Au NWs, (b) – (e) NMSAS with MnO<sub>2</sub> plating time 10 min, 15 min, 20 min, and 30 min, respectively. TEM images of the nanostructures: (f) Au NWs, (g) – (j) NMSAS with MnO<sub>2</sub> plating time 10 min, 15 min, 20 min, and 30 min, respectively.

**Figure S2.** EDS of NMSAS on flexible PET substrates with MnO<sub>2</sub> plating time (a) 10 min, (b) 15 min, (c) 20 min, and (d) 30 min. Corresponding Mn to O atomic ratios are (a) 1:2.02, (b) 1:1.89, (c) 1:1.91, and (d) 1:2.15.

**Figure S3.** High resolution XPS of Mn 2p, O 1s, and Au 4f electrons of NMSAS (MnO<sub>2</sub> plating time, 15 min). Blue dots and black lines represent the experimental and the fitted data, respectively.

**Figure S4.** CV data of the nanostructures on flexible PET substrates at various scan rates using a three-electrode system in Na<sub>2</sub>SO<sub>4(aq)</sub> (1 M). (a) Au NWs, (b) – (e) NMSAS with MnO<sub>2</sub> plating time 10 min, 15 min, 20 min, and 30 min, respectively. (f) Specific capacitances of Au NWs and NMSAS, derived from the data in (a) – (e).

**Figure S5.** CV data of NMSAS (MnO<sub>2</sub> plating time 15 min) at various scan rates in Na<sub>2</sub>SO<sub>4(aq)</sub> (1 M) using (a) three-electrode and (b) two- electrode systems. (c) Plots of specific capacitances using three-electrode (C<sub>3E</sub>: ■) and two-electrode (C<sub>2E</sub>: ★) systems, and ratios of C<sub>3E</sub> and C<sub>2E</sub> (△) at various scan rates.

**Figure S6.** Top: schematic diagram of solid-state NMSAS supercapacitor device, with PVA/H<sub>3</sub>PO<sub>4</sub> polymer as the electrolyte and separator. Bottom: definition of bending angle °.

**Figure S7.** Nyquist plot of a solid-state NMSAS supercapacitor device.

Calculations of electrochemical capacitance performances.

**Table S1.** Charges applied and MnO<sub>2</sub> masses loaded on Au NWs at different plating time.

| MnO <sub>2</sub> Plating Time (min) | Charge (mC) <sup>a</sup> | MnO <sub>2</sub> Mass (μg) <sup>b</sup> |
|-------------------------------------|--------------------------|-----------------------------------------|
| 10                                  | 27.4                     | 12.4                                    |
| 15                                  | 45.6                     | 20.6                                    |
| 20                                  | 63.8                     | 28.7                                    |
| 30                                  | 92.1                     | 41.5                                    |

<sup>a</sup> Charges are obtained by integrating the applied deposition currents against the plating time.

<sup>b</sup> Masses are converted from the charges by using Faraday's Law.

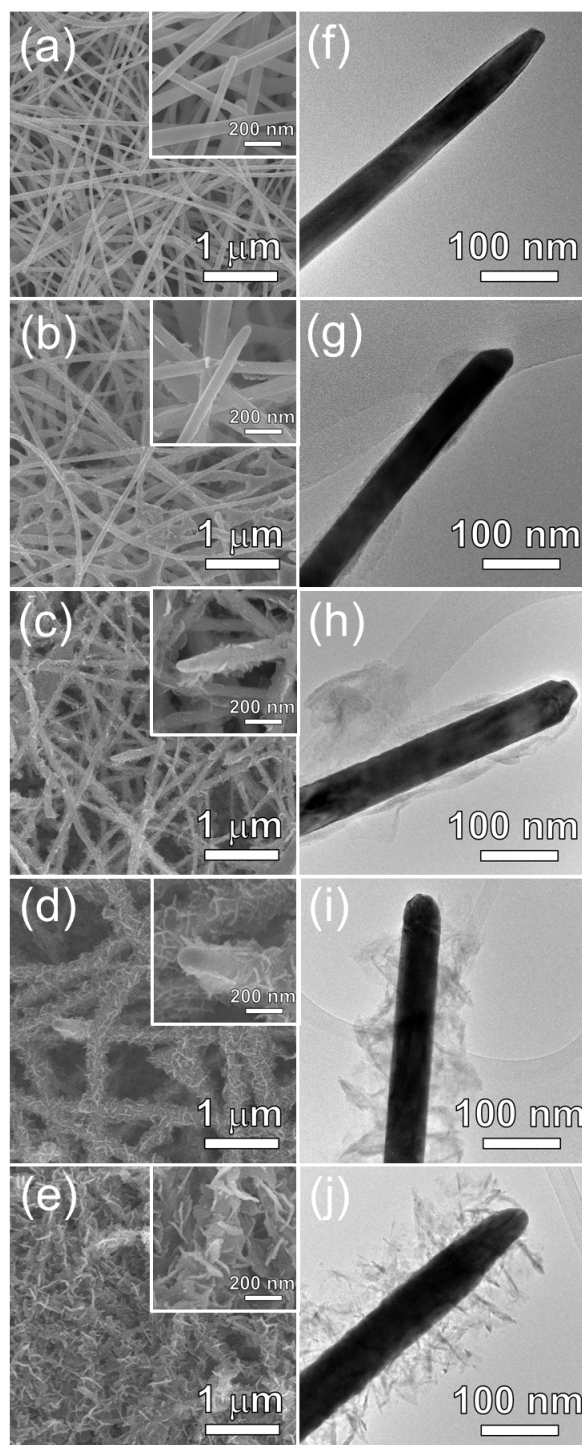

**Figure S1.** Low and high magnification (insets) SEM images of the nanostructures on flexible PET substrates: (a) Au NWs, (b) – (e) NMSAS with MnO<sub>2</sub> plating time 10 min, 15 min, 20 min, and 30 min, respectively. TEM images of the nanostructures: (f) Au NWs, (g) – (j) NMSAS with MnO<sub>2</sub> plating time 10 min, 15 min, 20 min, and 30 min, respectively.

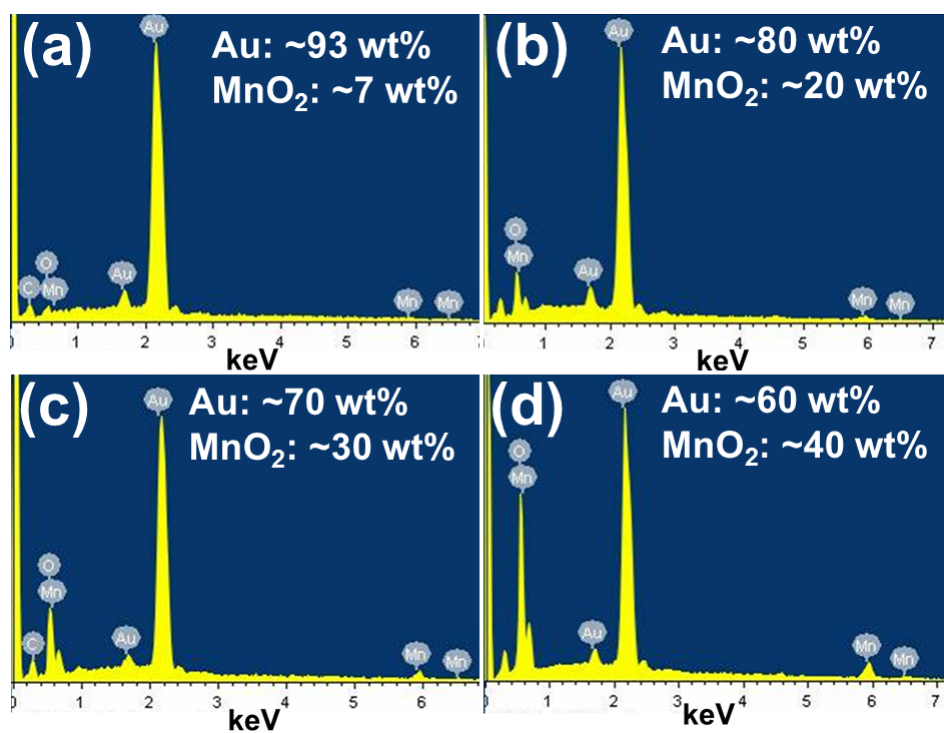

**Figure S2.** EDS of NMSAS on flexible PET substrates with MnO<sub>2</sub> plating time (a) 10 min, (b) 15 min, (c) 20 min, and (d) 30 min. Corresponding Mn to O atomic ratios are (a) 1:2.02, (b) 1:1.89, (c) 1:1.91, and (d) 1:2.15.

5

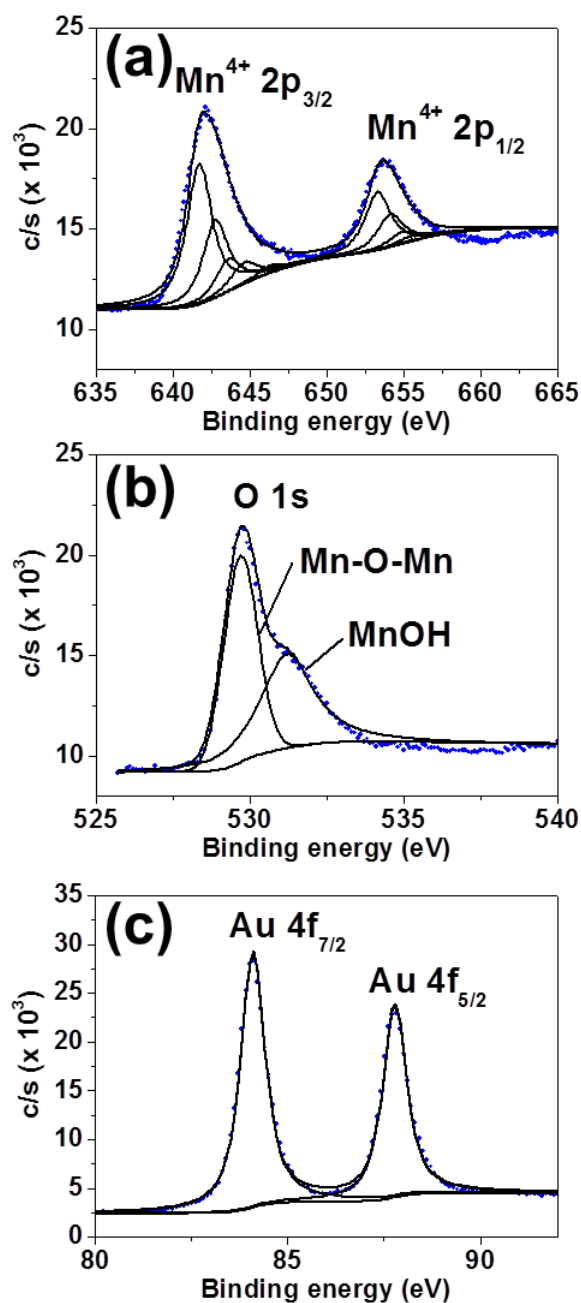

**Figure S3.** High resolution XPS of Mn 2p, O 1s, and Au 4f electrons of NMSAS (MnO<sub>2</sub> plating time, 15 min). Blue dots and black lines represent the experimental and the fitted data, respectively.

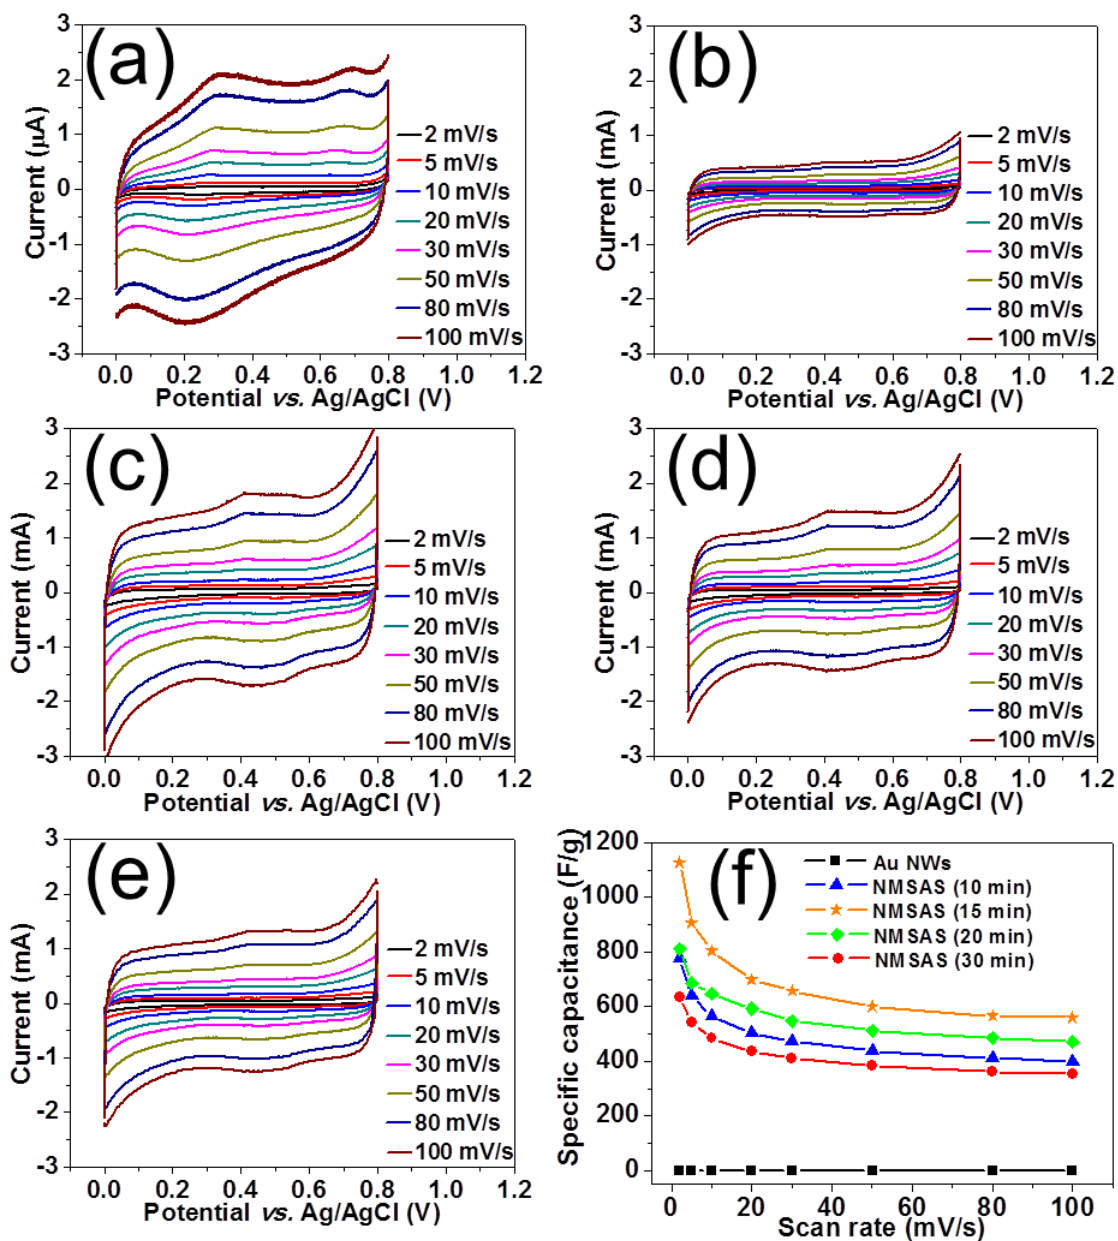

**Figure S4.** CV data of the nanostructures on flexible PET substrates at various scan rates using a three-electrode system in Na<sub>2</sub>SO<sub>4(aq)</sub> (1 M). (a) Au NWs, (b) – (e) NMSAS with MnO<sub>2</sub> plating time 10 min, 15 min, 20 min, and 30 min, respectively. (f) Specific capacitances of Au NWs and NMSAS, derived from the data in (a) – (e).

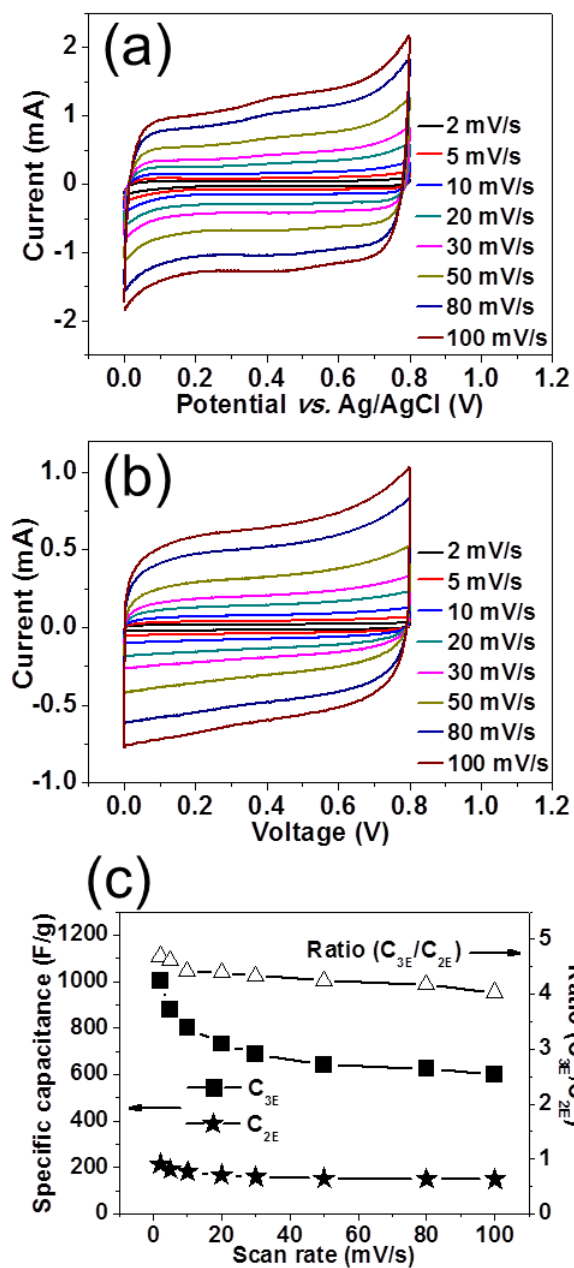

**Figure S5.** CV data of NMSAS ( $\text{MnO}_2$  plating time 15 min) at various scan rates in  $\text{Na}_2\text{SO}_{4(\text{aq})}$  (1 M) using (a) three-electrode and (b) two-electrode systems. (c) Plots of specific capacitances using three-electrode ( $C_{3E}$ : ■) and two-electrode ( $C_{2E}$ : ★) systems, and ratios of  $C_{3E}$  and  $C_{2E}$  ( $\Delta$ ) at various scan rates.

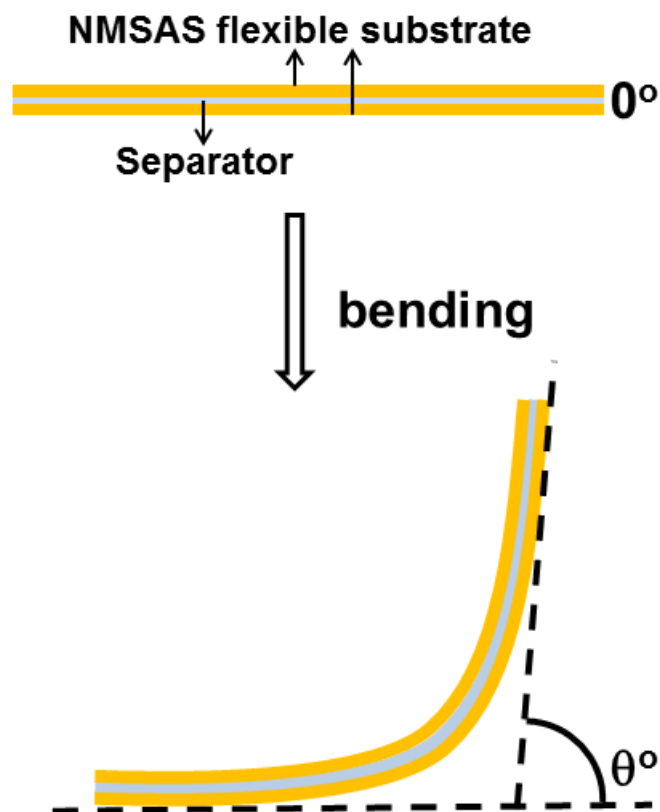

**Figure S6.** Top: schematic diagram of solid-state NMSAS supercapacitor device, with PVA/H<sub>3</sub>PO<sub>4</sub> polymer as the electrolyte and separator. Bottom: definition of bending angle  $^\circ$ .



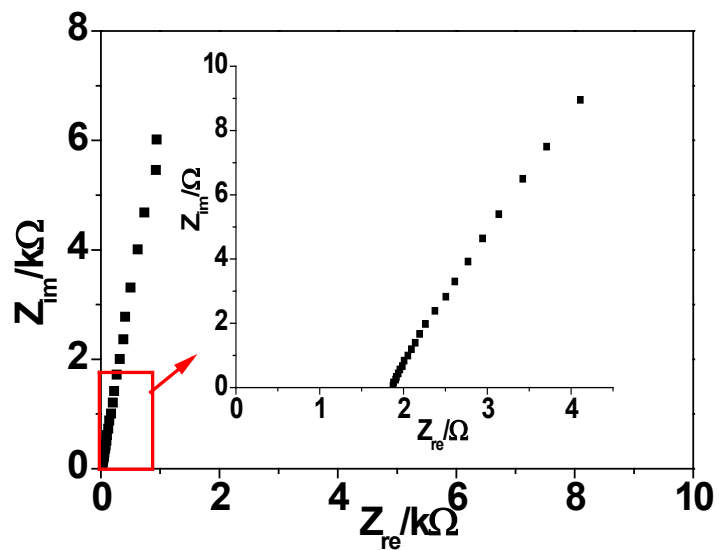

**Figure S7.** Nyquist plot of a solid-state NMSAS supercapacitor device.

## Calculations of electrochemical capacitance performances

Specific capacitances derived from CV tests using two- and three-electrode systems can be calculated from the equation:<sup>1</sup>

$$C = \frac{1}{m \nu (V_c - V_a)} \int_{V_a}^{V_c} I(V) dV$$

where C (F/g), m (g),  $\nu$  (V/s),  $V_c$  and  $V_a$ , and I (A) are the specific capacitance, the mass of MnO<sub>2</sub> on the electrode, the potential scan rate, the high and low potential limits of the CV test, and the instant current of the CV curve, respectively.

Specific capacitances derived from galvanostatic (GV) tests using a two-electrode system can be calculated from the equation:<sup>1,2</sup>

$$C = \frac{I \Delta t}{m \Delta V}$$

where C (F/g), I (A),  $\Delta t$  (s), m (g) and  $\Delta V$  are the specific capacitance, the discharge current, the discharge time, the mass of MnO<sub>2</sub> on the electrode, and the potential window, respectively.

Specific energy (E) and specific power (P) are derived from GV tests using a two-electrode system. They can be calculated from the following equations:<sup>2,3</sup>

$$E = (C \times \Delta V^2) / (2 \times 3.6)$$

$$P = E / \Delta t$$

where E (Wh/kg), P (W/kg), C (F/g),  $\Delta V$  (V), and  $\Delta t$  (h) are the specific energy, the specific power, the specific capacitance, the potential window, and the discharge time, respectively.

## Reference

1. T. Shinomiya, V. Gupta and N. Miura, *Electrochim. Acta* 2006, **51**, 4412.
2. P. Simon and Y. Gogotsi, *Nature Mater.* 2008, **7**, 845.
3. J. A Yan, E. Khoo, A. Sumboja and P. S. Lee, *ACS Nano* 2010, **4**, 4247.
